# Supplementary material for: Gas-phase structures and thermochemistry of neutral histidine and its conjugated acid and base
Source: Royal Society of Chemistry journal article supplement (doi:10.1039/c3cp00043e), 2013-01-01
Supplement: c3cp00043e.pdf [file c3cp00043e.pdf]

# *Gas-phase structures and thermochemistry of neutral histidine and its conjugated acid and base.*

**Vanessa Riffet and Guy Bouchoux\*.**

*Laboratoire des Mécanismes Réactionnels, Ecole Polytechnique, 91128 Palaiseau cedex,  
France.*

## **Electronic Supplementary Information**

ESI-1. Nomenclature describing conformers of neutral, protonated and deprotonated histidine used in Table ESI-T1, T2 and Figures ESI-F1, F2, F3.

ESI-2. Zwitterionic structures of histidine.

Figure ESI-F1. Optimized (B3LYP/6-31G(2df,p)) geometries and, into parentheses, relative G4MP2  $H^{\circ}_{298}$  and  $G^{\circ}_{298}$  ( $\text{kJ}\cdot\text{mol}^{-1}$ ) of neutral histidine.

Figure ESI-F2. Optimized (B3LYP/6-31G(2df,p)) geometries and, into parentheses, relative G4MP2  $H^{\circ}_{298}$  and  $G^{\circ}_{298}$  ( $\text{kJ}\cdot\text{mol}^{-1}$ ) of protonated histidine.

Figure ESI-F3. Optimized (B3LYP/6-31G(2df,p)) geometries and, into parentheses, relative G4MP2  $H^{\circ}_{298}$  and  $G^{\circ}_{298}$  ( $\text{kJ}\cdot\text{mol}^{-1}$ ) of deprotonated histidine.

Table ESI-T1. Total (Hartree) and relative ( $\text{kJ}\cdot\text{mol}^{-1}$ ) energies, intrinsic and mixing entropies ( $\text{J}\cdot\text{mol}^{-1}\cdot\text{K}^{-1}$ ) and molar fraction (%) calculated at the G4MP2 level for neutral, protonated and deprotonated histidine.

Table ESI-T2. Total energies (Hartree) and thermochemical parameters ( $\text{kJ}\cdot\text{mol}^{-1}$ ) calculated at the G4 level for Histidine, Glycine and Imidazole.

### ESI-1. Nomenclature describing conformers of neutral, protonated and deprotonated histidine used in Tables ESI-T1, T2 and Figures ESI-F1, F2, F3.

Conformations of the  $\alpha$ -amino acid group corresponding to the possible internal hydrogen bonds networks located in the OC(1)C(2)N moiety, will be denoted **I**, **I'**, **II** or **III** (Chart I). Each type of conformers, **I**, **I'**, **II** or **III**, may have C-N rotamers corresponding to different C(1)C(2)NH(H) dihedral angle values, these conformations are depicted by subscripts **A-E** as indicated in Chart I. We adopt the *antiperiplanar* (**a**) and *gauche* (**g+** or **g-**) denominations to describe the side chain arrangements along the C(2)C(3) bond while the two possible conformations along the C(3)C(4) sigma bonds are denoted *right* (**r**) or *left* (**l**) (Chart II).

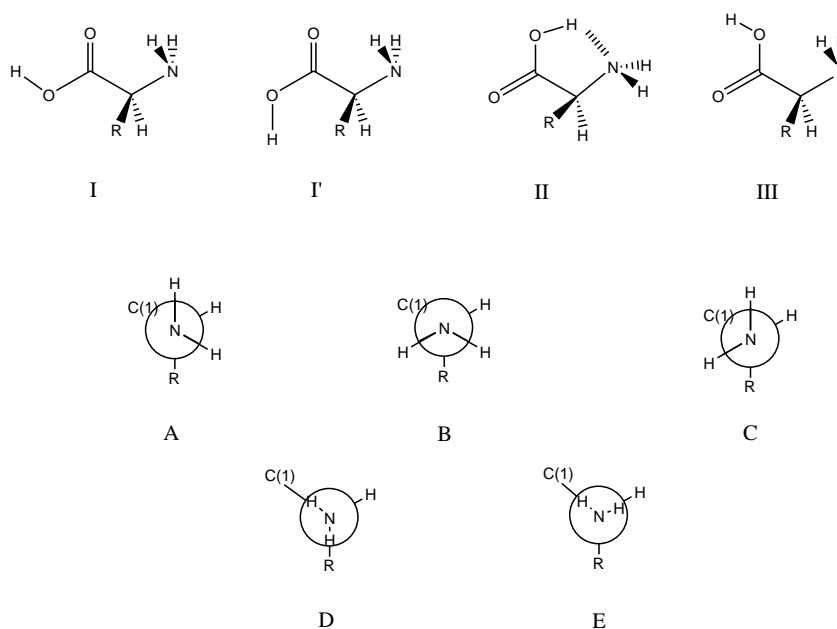

Chart I

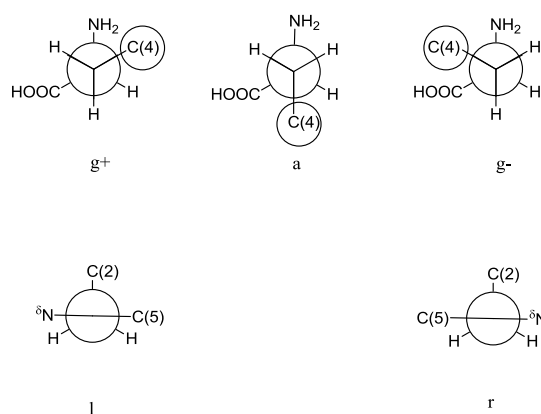

## Chart II

### ESI-2. Zwitterionic structures of histidine.

Previous studies, conducted at the B3LYP/6-311G(2df,p)//B3LYP/6-311G(d) and MP2/6-311G(2df,p)//B3LYP/6-311G(d) levels, indicated that zwitterionic forms of histidine are situated at last 50 kJ.mol<sup>-1</sup> higher in energy than the most stable canonical form.<sup>29,30</sup> The two most stable zwitterionic forms located by Lin and coworkers<sup>29</sup> formally correspond to structures **His1** and **His2** where the hydroxylic proton has moved toward the nitrogen of the amino group. We observe that, starting from **His1** and **His2**, scans conducted at the B3LYP/6-31+G(d,p) level show a continuous increase in energy when the proton migrates from the OH group to the amino nitrogen atom. At this level of theory, the potential energy gap is equal to 49 (from **His1**) and 55 (from **His2**) kJ.mol<sup>-1</sup> thus confirming the finding of Lin et al.<sup>29</sup> However, tentative of geometry optimization of the corresponding zwitterionic structures by the G4MP2 method collapsed on the canonical forms **His1** and **His2**. Similarly, zwitterionic structures resulting from protonation of the imidazole ring easily collapse to more stable canonical forms by migration of the N<sup>δ</sup> proton to the carboxylate group. Thus the lone identified zwitterionic forms are characterized by large distances between these two structural moieties. This is the case of conformers **His16** and **His17** reported in Table ESI-T1 and Figure ESI-F1. These structures are however situated 168 and 174 kJ.mol<sup>-1</sup> above **His1** and their occurrence in the gas phase, under usual experimental conditions, may be certainly ruled out.

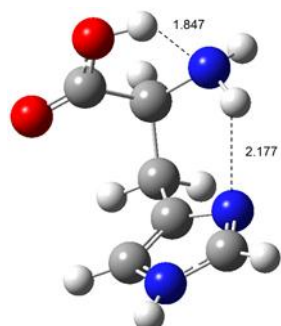

**His1** His<sup>ε</sup>II<sub>Bg-r</sub> [0.0; 0.0]

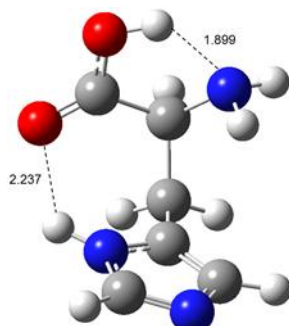

**His2** His<sup>δ</sup>II<sub>Bg-l</sub> [2.2; 3.9]

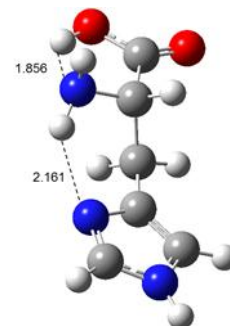

**His3** His<sup>ε</sup>II<sub>Ag+1</sub> [5.0; 4.6]

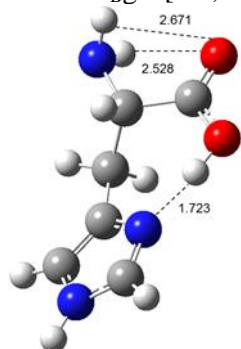

**His4** His<sup>ε</sup>I<sub>car</sub> [8.7; 6.0]

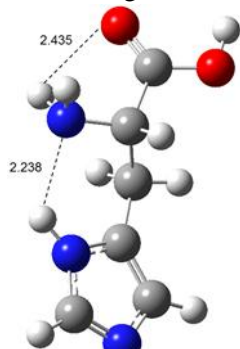

**His5** His<sup>δ</sup>I<sub>cg+1</sub> [9.1; 6.7]

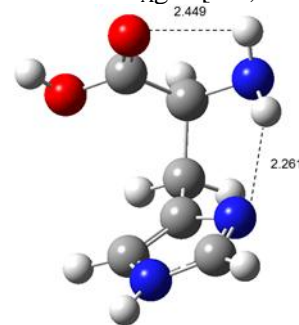

**His8** His<sup>ε</sup>I<sub>cg-r</sub> [10.8; 7.8]

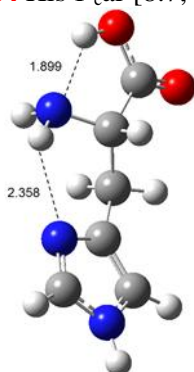

**His6** His<sup>ε</sup>II<sub>Bg+1</sub> [10.3; 9.2]

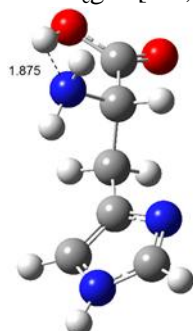

**His11** His<sup>ε</sup>II<sub>Ag+r</sub> [12.4; 9.4]

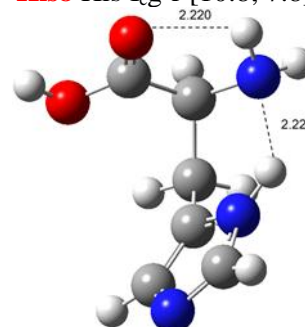

**His7** His<sup>δ</sup>I<sub>Ag-r</sub> [10.3; 9.5]

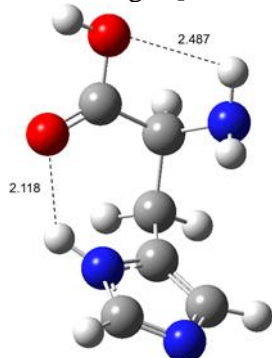

**His9** His<sup>δ</sup>III<sub>cg-l</sub> [11.3; 9.5]

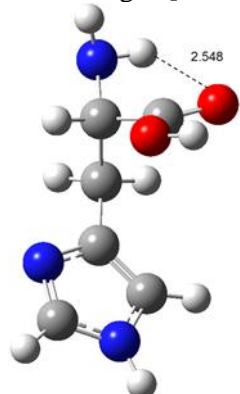

**His15** His<sup>ε</sup>I<sub>cal</sub> [16.5; 10.5]

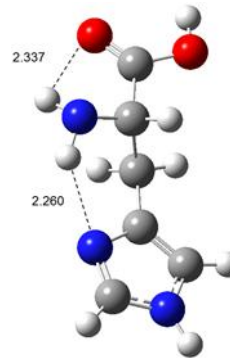

**His14** His<sup>ε</sup>I<sub>Bg+1</sub> [15.3; 12.1]

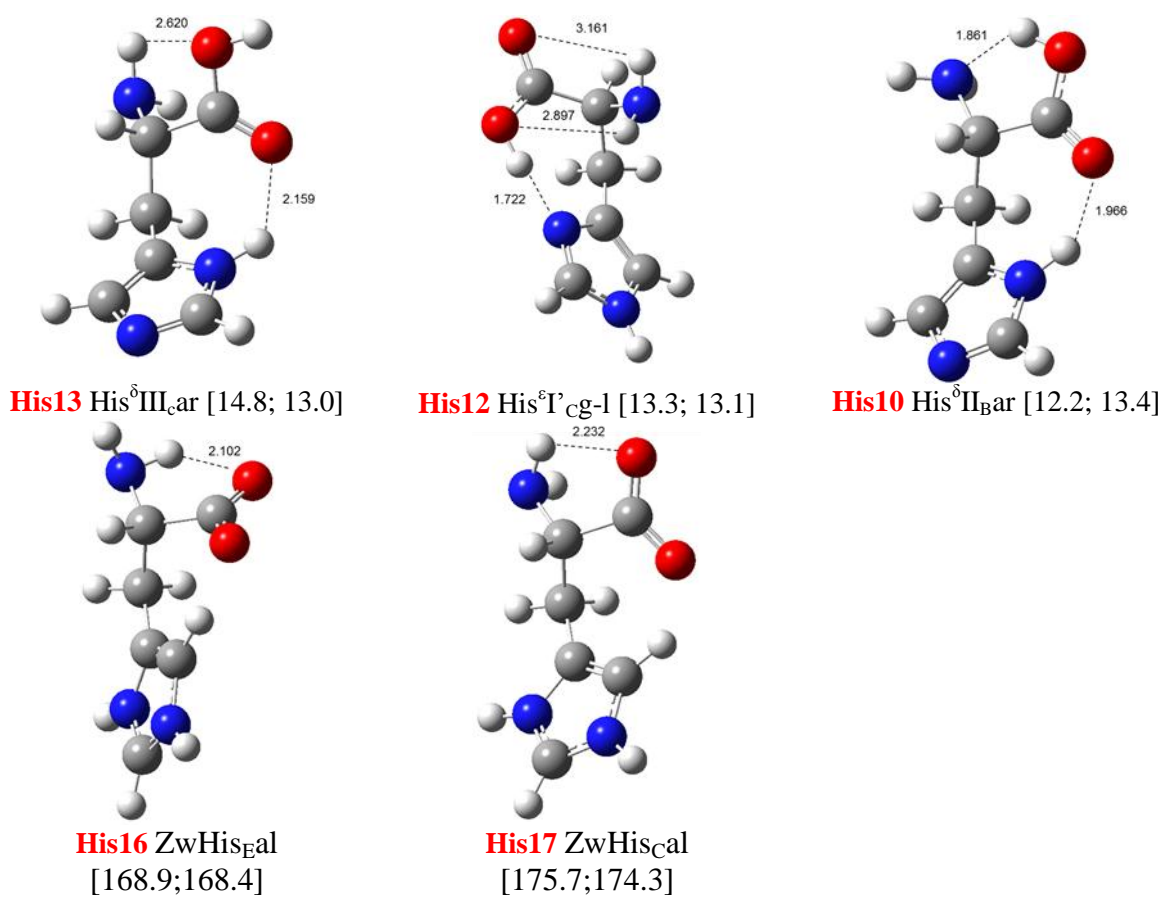

Figure ESI-F1. Optimized (B3LYP/6-31G(2df,p)) geometries and, into brackets, relative G4MP2  $H^{\circ}_{298}$  and  $G^{\circ}_{298}$  ( $\text{kJ}\cdot\text{mol}^{-1}$ ) of neutral histidine.

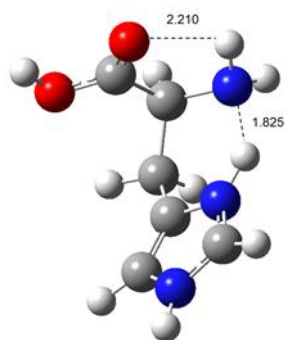

**HisH1** HisHArI<sub>Ag</sub>-r [0.0; 0.0]

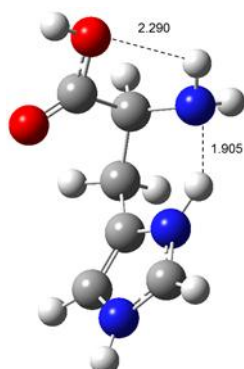

**HisH2** HisHArIII<sub>Ag</sub>-r [2.3; 2.6]

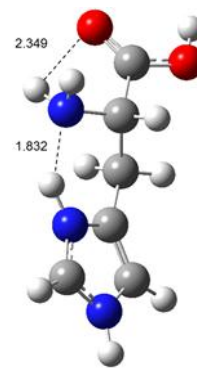

**HisH3** HisHArI<sub>Cg</sub>+1 [3.6; 3.1]

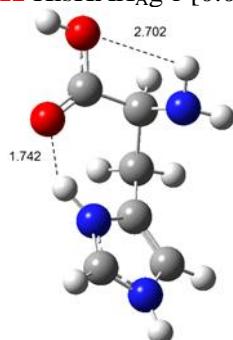

**HisH4** HisHArIII<sub>Ag</sub>-l [5.2; 4.0]

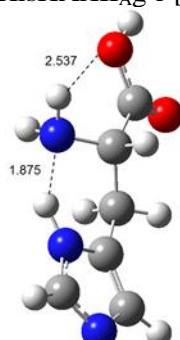

**HisH8** HisHArIII<sub>Cg</sub>+1 [8.4; 6.9]

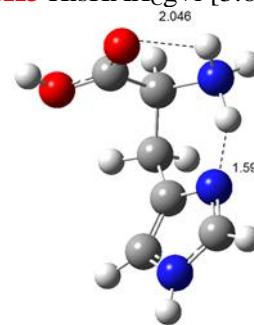

**HisH5** HisH<sup>6</sup>I<sub>g</sub>-r [5.8; 7.8]

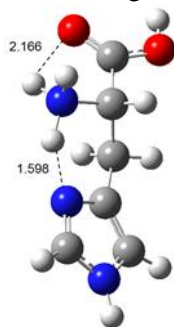

**HisH6** HisH<sup>6</sup>I<sub>g</sub>+1 [7.1; 8.1]

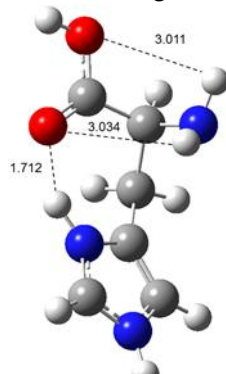

**HisH9** HisHArIII<sub>Cg</sub>-l [8.4; 8.2]

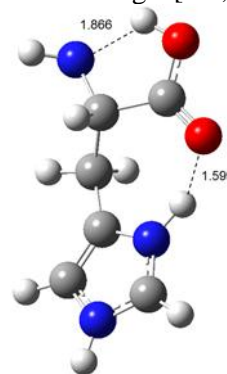

**HisH7** HisHArII<sub>B̄</sub> [7.3; 10.1]

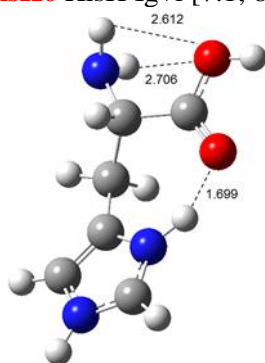

**HisH10** HisHArIII<sub>Car</sub> [11.2;  
10.5]

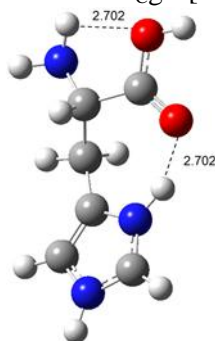

**HisH11** HisHArIII<sub>Ar</sub> [11.5;  
11.6]

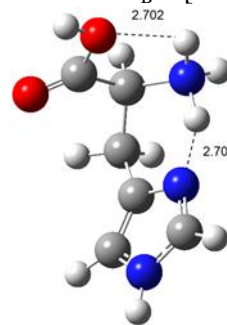

**HisH12** HisH<sup>6</sup>III<sub>g</sub>-r [16.5; 17.9]

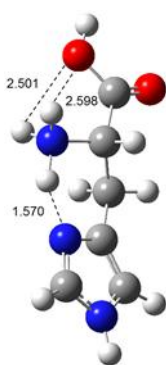

**HisH13** HisH<sup>6</sup>IIIg+1 [19.2;  
18.6]

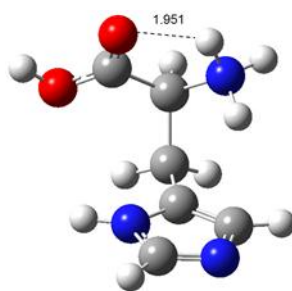

**HisH14** HisH<sup>6</sup>Ig-1 [83.2; 82.6]

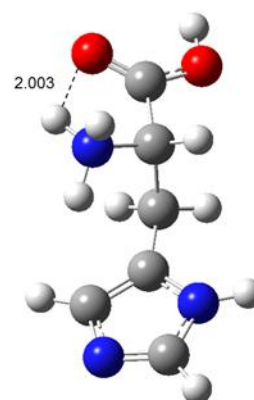

**HisH15** HisH<sup>6</sup>Ig+r [85.0; 83.6]

Figure ESI-F2. Optimized (B3LYP/6-31G(2df,p)) geometries and, into brackets, relative G4MP2  $H^{\circ}_{298}$  and  $G^{\circ}_{298}$  ( $\text{kJ}\cdot\text{mol}^{-1}$ ) of protonated histidine.

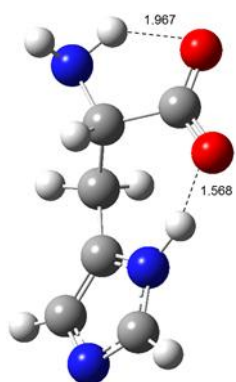

**His-H2** His-H<sup>δ</sup><sub>Ear</sub> [0.3; 0.0]

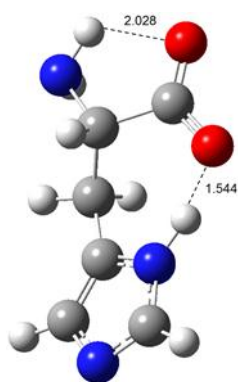

**His-H1** His-H<sup>δ</sup><sub>Dar</sub> [0.0; 1.6]

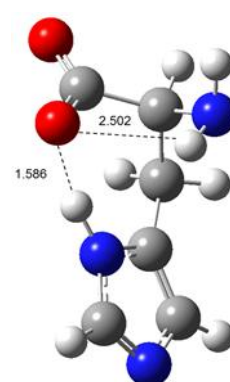

**His-H4** His-H<sup>δ</sup><sub>Cg-l</sub> [6.2; 5.5]

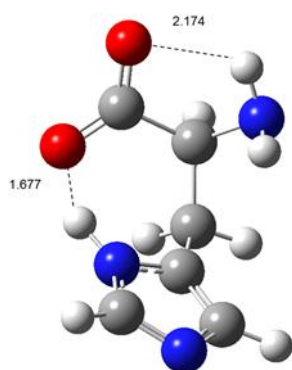

**His-H3** His-H<sup>δ</sup><sub>Dg-l</sub> [3.4; 5.6]

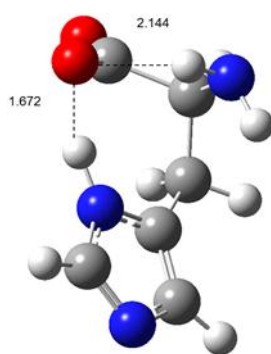

**His-H5** His-H<sup>δ</sup><sub>Bg-l</sub> [6.5; 8.7]

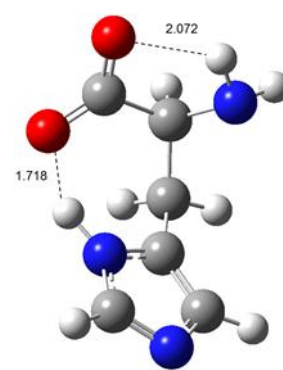

**His-H6** His-H<sup>δ</sup><sub>Eg-l</sub> [13.6;  
15.0]

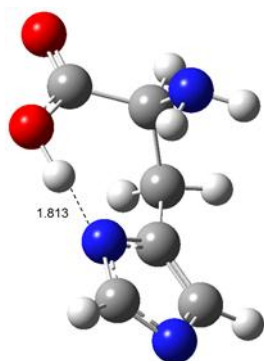

**His-H7** His-HAr<sup>l</sup><sub>Bg-l</sub> [17.9;  
19.8]

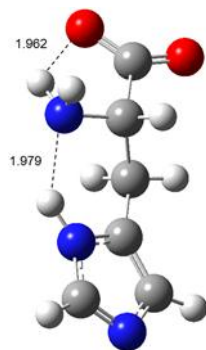

**His-H8** His-H<sup>δ</sup><sub>Eg+l</sub> [22.6;  
22.8]

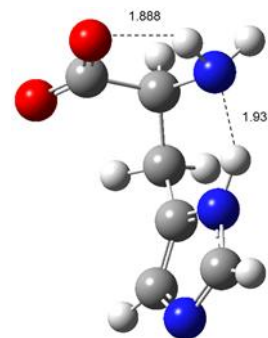

**His-H9** His-H<sup>δ</sup><sub>Eg-r</sub> [33.6;  
34.5]



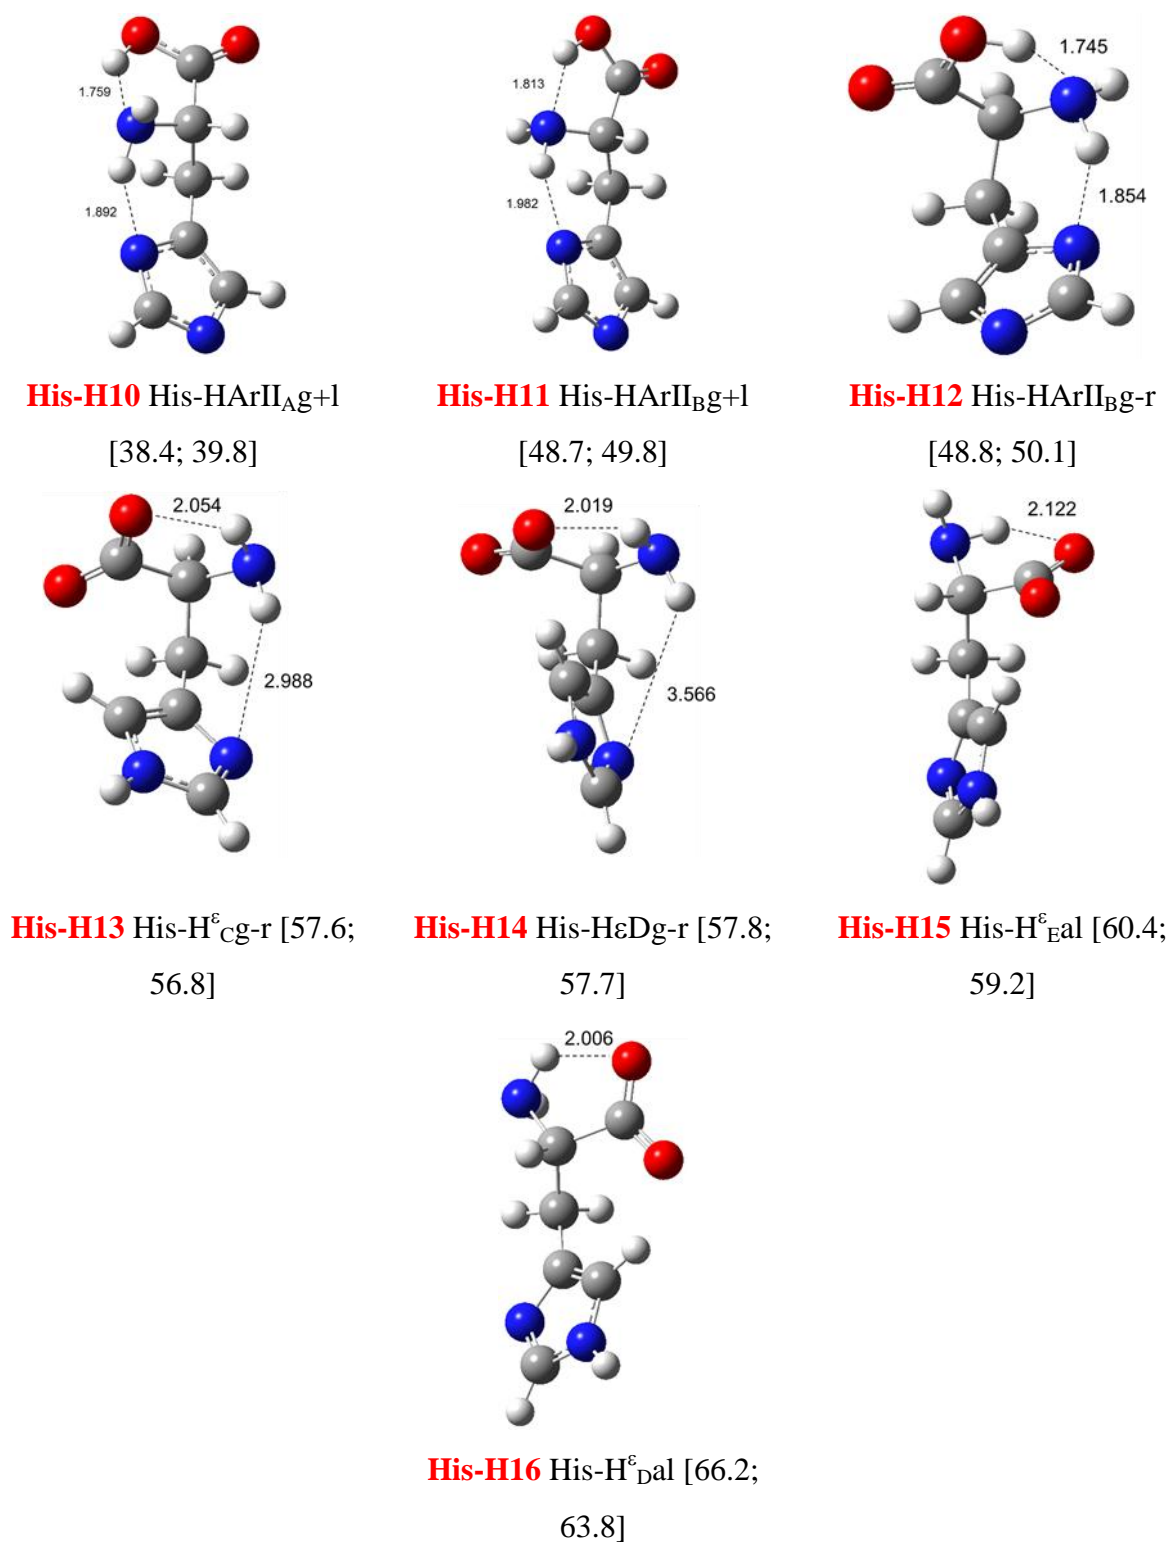

Figure ESI-F3. Optimized (B3LYP/6-31G(2df,p)) geometries and, into brackets, relative G4MP2  $H^{\circ}_{298}$  and  $G^{\circ}_{298}$  ( $\text{kJ}\cdot\text{mol}^{-1}$ ) of deprotonated histidine.

Table ESI-T1.Total (Hartree) and relative (kJ.mol<sup>-1</sup>)energies, intrinsic and mixing entropies (J.mol<sup>-1</sup>.K<sup>-1</sup>) and molar fraction (%) calculated at the G4MP2 level for neutral, protonated and deprotonated histidine (in bold, averaged 298 K values).

| conformer name | conformer nomenclature                | H° <sub>0</sub><br>(Hartree) | H° <sub>298</sub><br>(Hartree) | G° <sub>298</sub><br>(Hartree) | ΔH° <sub>298</sub> | ΔG° <sub>298</sub> | S° <sub>298</sub> | x <sub>i</sub> | S° <sub>298mix</sub> |
|----------------|---------------------------------------|------------------------------|--------------------------------|--------------------------------|--------------------|--------------------|-------------------|----------------|----------------------|
| <b>His1</b>    | His <sup>ε</sup> II <sub>Bg</sub> -r  | -548.074309                  | -548.063401                    | -548.110713                    | 0.0                | 0.0                | 416.8             | 0.59           | 2.60                 |
| <b>His2</b>    | His <sup>δ</sup> II <sub>Bg</sub> -l  | -548.073376                  | -548.062571                    | -548.109225                    | 2.2                | 3.9                | 411.0             | 0.12           | 2.14                 |
| <b>His3</b>    | His <sup>ε</sup> II <sub>Ag</sub> +l  | -548.07247                   | -548.061487                    | -548.108968                    | 5.0                | 4.6                | 418.3             | 0.09           | 1.85                 |
| <b>His4</b>    | His <sup>ε</sup> I <sub>car</sub>     | -548.071325                  | -548.06008                     | -548.108415                    | 8.7                | 6.0                | 425.9             | 0.05           | 1.29                 |
| <b>His5</b>    | His <sup>δ</sup> I <sub>cg</sub> +l   | -548.071222                  | -548.059948                    | -548.108178                    | 9.1                | 6.7                | 424.9             | 0.04           | 1.09                 |
| <b>His8</b>    | His <sup>ε</sup> I <sub>cg</sub> -r   | -548.070647                  | -548.059302                    | -548.107752                    | 10.8               | 7.8                | 426.9             | 0.03           | 0.79                 |
| <b>His6</b>    | His <sup>ε</sup> II <sub>Bg</sub> +l  | -548.070521                  | -548.059488                    | -548.107214                    | 10.3               | 9.2                | 420.5             | 0.01           | 0.52                 |
| <b>His11</b>   | His <sup>ε</sup> II <sub>Ag</sub> +r  | -548.069899                  | -548.058663                    | -548.107133                    | 12.4               | 9.4                | 427.0             | 0.01           | 0.49                 |
| <b>His7</b>    | His <sup>δ</sup> I <sub>Ag</sub> -r   | -548.070591                  | -548.059493                    | -548.107105                    | 10.3               | 9.5                | 419.5             | 0.01           | 0.48                 |
| <b>His9</b>    | His <sup>δ</sup> III <sub>Cg</sub> -l | -548.070313                  | -548.059108                    | -548.107086                    | 11.3               | 9.5                | 422.7             | 0.01           | 0.47                 |
| <b>His15</b>   | His <sup>ε</sup> I <sub>cal</sub>     | -548.068671                  | -548.057108                    | -548.106715                    | 16.5               | 10.5               | 437.1             | 0.01           | 0.35                 |
| <b>His14</b>   | His <sup>ε</sup> I <sub>Bg</sub> +l   | -548.068934                  | -548.057584                    | -548.106087                    | 15.3               | 12.1               | 427.3             | 0.00           | 0.20                 |
| <b>His13</b>   | His <sup>δ</sup> III <sub>car</sub>   | -548.069025                  | -548.057766                    | -548.105771                    | 14.8               | 13.0               | 422.9             | 0.00           | 0.16                 |
| <b>His12</b>   | His <sup>ε</sup> I <sub>Cg</sub> -l   | -548.069393                  | -548.058326                    | -548.105718                    | 13.3               | 13.1               | 417.5             | 0.00           | 0.15                 |
| <b>His10</b>   | His <sup>δ</sup> II <sub>Bar</sub>    | -548.069621                  | -548.058768                    | -548.105601                    | 12.2               | 13.4               | 412.6             | 0.00           | 0.13                 |
| <b>His16</b>   | ZwHis <sub>Eal</sub>                  | -548.010125                  | -547.999063                    | -548.046563                    | 168.9              | 168.4              | 418.5             | 0.00           | 0.00                 |
| <b>His17</b>   | ZwHis <sub>Cal</sub>                  | -548.007663                  | -547.996495                    | -548.044338                    | 175.7              | 174.3              | 421.5             | 0.00           | 0.00                 |
|                |                                       |                              | <b>-548.0623373</b>            | <b>-548.109767</b>             |                    |                    | <b>417.9</b>      | <b>1.00</b>    | <b>12.70</b>         |

| conformer name | conformer nomenclature              | H° <sub>0</sub><br>(Hartree) | H° <sub>298</sub><br>(Hartree) | G° <sub>298</sub><br>(Hartree) | ΔH° <sub>298</sub> | ΔG° <sub>298</sub> | S° <sub>298</sub> | x <sub>i</sub> | S° <sub>298mix</sub> |
|----------------|-------------------------------------|------------------------------|--------------------------------|--------------------------------|--------------------|--------------------|-------------------|----------------|----------------------|
| <b>HisH1</b>   | HisHArI <sub>Ag</sub> -r            | -548.44494                   | -548.433983                    | -548.481351                    | 0.0                | 0.0                | 417.3             | 0.48           | 2.93                 |
| <b>HisH2</b>   | HisHArIII <sub>Ag</sub> -r          | -548.444095                  | -548.433113                    | -548.480367                    | 2.3                | 2.6                | 416.3             | 0.17           | 2.51                 |
| <b>HisH3</b>   | HisHArI <sub>Cg</sub> +l            | -548.443692                  | -548.432613                    | -548.480172                    | 3.6                | 3.1                | 419.0             | 0.14           | 2.28                 |
| <b>HisH4</b>   | HisHArIII <sub>Ag</sub> -l          | -548.443201                  | -548.431997                    | -548.479838                    | 5.2                | 4.0                | 421.5             | 0.10           | 1.90                 |
| <b>HisH8</b>   | HisHArIII <sub>Cg</sub> +l          | -548.441874                  | -548.430773                    | -548.478721                    | 8.4                | 6.9                | 422.4             | 0.03           | 0.88                 |
| <b>HisH5</b>   | HisH <sup>ε</sup> I <sub>g</sub> -r | -548.442484                  | -548.431758                    | -548.478391                    | 5.8                | 7.8                | 410.9             | 0.02           | 0.69                 |
| <b>HisH6</b>   | HisH <sup>ε</sup> I <sub>g</sub> +l | -548.442189                  | -548.431291                    | -548.478272                    | 7.1                | 8.1                | 413.9             | 0.02           | 0.63                 |
| <b>HisH9</b>   | HisHArIII <sub>Cg</sub> -l          | -548.441959                  | -548.430782                    | -548.478225                    | 8.4                | 8.2                | 418.0             | 0.02           | 0.60                 |

|               |                                       |             |                    |                    |      |      |              |             |              |
|---------------|---------------------------------------|-------------|--------------------|--------------------|------|------|--------------|-------------|--------------|
| <b>HisH7</b>  | HisHArII <sub>B</sub> ar              | -548.441971 | -548.43121         | -548.477491        | 7.3  | 10.1 | 407.8        | 0.01        | 0.33         |
| <b>HisH10</b> | HisHArIII <sub>C</sub> ar             | -548.440883 | -548.4297          | -548.477335        | 11.2 | 10.5 | 419.7        | 0.01        | 0.29         |
| <b>HisH11</b> | HisHArIII <sub>A</sub> ar             | -548.440716 | -548.429602        | -548.476926        | 11.5 | 11.6 | 416.9        | 0.00        | 0.21         |
| <b>HisH12</b> | HisH <sup>e</sup> III <sub>g</sub> -r | -548.438475 | -548.427698        | -548.47454         | 16.5 | 17.9 | 412.7        | 0.00        | 0.02         |
| <b>HisH13</b> | HisH <sup>e</sup> III <sub>g</sub> +l | -548.437637 | -548.426670        | -548.474256        | 19.2 | 18.6 | 419.3        | 0.00        | 0.02         |
| <b>HisH14</b> | HisH <sup>δ</sup> I <sub>g</sub> -l   | -548.41338  | -548.402277        | -548.449905        | 83.2 | 82.6 | 419.6        | 0.00        | 0.00         |
| <b>HisH15</b> | HisH <sup>δ</sup> I <sub>g</sub> +r   | -548.412858 | -548.401621        | -548.449506        | 85.0 | 83.6 | 421.9        | 0.00        | 0.00         |
|               |                                       |             | <b>-548.433115</b> | <b>-548.480525</b> |      |      | <b>417.7</b> | <b>1.00</b> | <b>13.29</b> |

| conformer name | conformer nomenclature               | H <sup>o</sup> <sub>0</sub><br>(Hartree) | H <sup>o</sup> <sub>298</sub><br>(Hartree) | G <sup>o</sup> <sub>298</sub><br>(Hartree) | ΔH <sup>o</sup> <sub>298</sub> | ΔG <sup>o</sup> <sub>298</sub> | S <sup>o</sup> <sub>298</sub> | x <sub>i</sub> | S <sup>o</sup> <sub>298mix</sub> |
|----------------|--------------------------------------|------------------------------------------|--------------------------------------------|--------------------------------------------|--------------------------------|--------------------------------|-------------------------------|----------------|----------------------------------|
| <b>His-H2</b>  | His-H <sup>o</sup> <sub>E</sub> ar   | -547.552608                              | -547.541887                                | -547.588915                                | 0.3                            | 0.0                            | 414.3                         | 0.56           | 2.69                             |
| <b>His-H1</b>  | His-H <sup>δ</sup> <sub>D</sub> ar   | -547.552617                              | -547.542003                                | -547.588295                                | 0.0                            | 1.6                            | 407.9                         | 0.29           | 2.99                             |
| <b>His-H4</b>  | His-H <sup>δ</sup> <sub>C</sub> g-l  | -547.550471                              | -547.539628                                | -547.586809                                | 6.2                            | 5.5                            | 415.7                         | 0.06           | 1.43                             |
| <b>His-H3</b>  | His-H <sup>δ</sup> <sub>D</sub> g-l  | -547.55124                               | -547.540694                                | -547.586796                                | 3.4                            | 5.6                            | 406.2                         | 0.06           | 1.42                             |
| <b>His-H5</b>  | His-H <sup>δ</sup> <sub>D</sub> g-l  | -547.550129                              | -547.539543                                | -547.585601                                | 6.5                            | 8.7                            | 405.8                         | 0.02           | 0.59                             |
| <b>His-H6</b>  | His-H <sup>δ</sup> <sub>E</sub> g-l  | -547.547444                              | -547.536826                                | -547.583204                                | 13.6                           | 15.0                           | 408.6                         | 0.00           | 0.08                             |
| <b>His-H7</b>  | His-HI <sup>o</sup> <sub>B</sub> g-l | -547.545822                              | -547.53517                                 | -547.581388                                | 17.9                           | 19.8                           | 407.2                         | 0.00           | 0.01                             |
| <b>His-H8</b>  | His-H <sup>δ</sup> <sub>E</sub> g+l  | -547.544129                              | -547.533413                                | -547.580235                                | 22.6                           | 22.8                           | 412.5                         | 0.00           | 0.00                             |
| <b>His-H9</b>  | His-H <sup>δ</sup> <sub>E</sub> g-r  | -547.539736                              | -547.529188                                | -547.575759                                | 33.6                           | 34.5                           | 410.3                         | 0.00           | 0.00                             |
| <b>His-H10</b> | His-HII <sub>A</sub> g+l             | -547.537869                              | -547.527392                                | -547.57374                                 | 38.4                           | 39.8                           | 408.3                         | 0.00           | 0.00                             |
| <b>His-H11</b> | His-HII <sub>B</sub> g+l             | -547.53399                               | -547.523461                                | -547.569966                                | 48.7                           | 49.8                           | 409.7                         | 0.00           | 0.00                             |
| <b>His-H12</b> | His-HII <sub>B</sub> g-r             | -547.533868                              | -547.523432                                | -547.569817                                | 48.8                           | 50.1                           | 408.7                         | 0.00           | 0.00                             |
| <b>His-H13</b> | His-H <sup>e</sup> <sub>C</sub> g-r  | -547.531009                              | -547.520059                                | -547.567276                                | 57.6                           | 56.8                           | 416.0                         | 0.00           | 0.00                             |
| <b>His-H14</b> | His-H <sup>e</sup> <sub>D</sub> g-r  | -547.530923                              | -547.519973                                | -547.566935                                | 57.8                           | 57.7                           | 413.8                         | 0.00           | 0.00                             |
| <b>His-H15</b> | His-H <sup>e</sup> <sub>E</sub> al   | -547.53001                               | -547.519003                                | -547.566355                                | 60.4                           | 59.2                           | 417.2                         | 0.00           | 0.00                             |
| <b>His-H16</b> | His-H <sup>e</sup> <sub>D</sub> al   | -547.527845                              | -547.516789                                | -547.564609                                | 66.2                           | 63.8                           | 421.3                         | 0.00           | 0.00                             |
|                |                                      |                                          | <b>-547.541659</b>                         | <b>-547.588406</b>                         |                                |                                | <b>411.9</b>                  | <b>1.00</b>    | <b>9.21</b>                      |

Table ESI-T2.Total energies (Hartree) calculated at the G4 level for Histidine, Glycine and Imidazole.

| Species                          | H <sup>o</sup> <sub>0</sub> (Hartree) | H <sup>o</sup> <sub>298</sub> (Hartree) | G <sup>o</sup> <sub>298</sub> (Hartree) |
|----------------------------------|---------------------------------------|-----------------------------------------|-----------------------------------------|
| <b>His1</b>                      | -548.518676                           | -548.507768                             | -548.555080                             |
| <b>His2</b>                      | -548.517637                           | -548.506831                             | -548.553485                             |
| <b>His3</b>                      | -548.516708                           | -548.505725                             | -548.553205                             |
| <b>HisH1</b>                     | -548.889402                           | -548.878444                             | -548.925812                             |
| <b>HisH2</b>                     | -548.888459                           | -548.877477                             | -548.924731                             |
| <b>HisH3</b>                     | -548.888000                           | -548.876922                             | -548.924481                             |
| <b>HisH4</b>                     | -548.887419                           | -548.876214                             | -548.924056                             |
| <b>His-H1</b>                    | -547.997199                           | -547.986585                             | -548.032877                             |
| <b>His-H2</b>                    | -547.997247                           | -547.986526                             | -548.033554                             |
| <b>Imidazole</b>                 | -226.100069                           | -226.095333                             | -226.126344                             |
| <b>ImidazoleH<sup>+</sup></b>    | -226.457854                           | -226.453102                             | -226.484193                             |
| <b>[Imidazole-H]<sup>-</sup></b> | -225.544932                           | -225.540418                             | -225.571049                             |
| <b>Glycine</b>                   | -284.303472                           | -284.296789                             | -284.332755                             |
| <b>GlycineH<sup>+</sup></b>      | -284.639318                           | -284.632855                             | -284.668057                             |
| <b>[Glycine-H]<sup>-</sup></b>   | -283.759415                           | -283.753213                             | -283.787883                             |
| <b>H<sup>+</sup></b>             | 0.000000                              | 0.002359                                |                                         |
